# Supplementary material for: MOF positioning technology and device fabrication
Source: Royal Society of Chemistry journal article supplement (doi:10.1039/c4cs00089g), 2014-01-01
Supplement: c4cs00089g19.pdf [file c4cs00089g19.pdf]

List of videos:

| <b>File Name (.mp4)</b>                                | <b>content</b>                                                                                             |
|--------------------------------------------------------|------------------------------------------------------------------------------------------------------------|
| <i>Fig 04 - uCP of SAM</i>                             | Microcontact printing ( $\mu$ CP) for a self-assembled monolayer (SAM) pattern                             |
| <i>Fig 05 a - LPE</i>                                  | Liquid-Phase Epitaxy (LPE) for MOF patterns                                                                |
| <i>Fig 05 b - LbL</i>                                  | Layer-by-Layer (LbL) approach for the controlled growth of MOFs on Self-Assembled Monolayer (SAM) patterns |
| <i>Fig 07 - Gel-layer</i>                              | Gel-layer synthesis for MOF pattern fabrication                                                            |
| <i>Fig 09 a - Electrochemical</i>                      | Electrochemical deposition of a MOF film on a lithographed metal pattern                                   |
| <i>Fig 09 b - Machined</i>                             | Precision milling combined with electrochemical deposition of a MOF                                        |
| <i>Fig 11 - Seeding</i>                                | MOF pattern fabrication by seeding                                                                         |
| <i>Fig 11 b - Micromolding</i>                         | Micromolding for MOF pattern fabrication                                                                   |
| <i>Fig 12 a - uCP</i>                                  | Spray coating for MOF pattern fabrication                                                                  |
| <i>Fig 17 b - Cu conversion</i>                        | Combining photolithography and Cu conversion for MOFs patterns                                             |
| <i>Fig 17 c - ZnO printing and conversion</i>          | Solvent-free conversion of ZnO films into ZIF-8 framework patterns                                         |
| <i>Fig 18 - Inkjet printing</i>                        | MOF deposition with ink-jet printing process                                                               |
| <i>Fig 19 - Spray coating</i>                          | Spray coating for MOF pattern fabrication                                                                  |
| <i>Fig 20 - Positive and negative photolithography</i> | Photolithographic techniques for positive and negative photoresists                                        |
| <i>Fig 21 a - Photolithography</i>                     | Photolithography of a MOF combining sol-gel with deep X-ray lithography                                    |
| <i>Fig 21 b - Photolithography</i>                     | Photolithography of a MOF film using UV radiation                                                          |
| <i>Fig 21 c - Photolithography</i>                     | Combining UV photolithography with Imprinting for MOF pattern fabrication                                  |
| <i>Fig 22 - MFCs</i>                                   | Synthesis of Magnetic Framework Composites (MFCs)                                                          |
